# Supplementary material for: Complete Mitogenomes of Two Aragoa Species and Phylogeny of Plantagineae (Plantaginaceae, Lamiales) Using Mitochondrial Genes and the Nuclear Ribosomal RNA Repeat
Source: MDPI journal article supplement (doi:10.3390/plants10122673), 2021-12-05
Supplement: s1 [file s1]

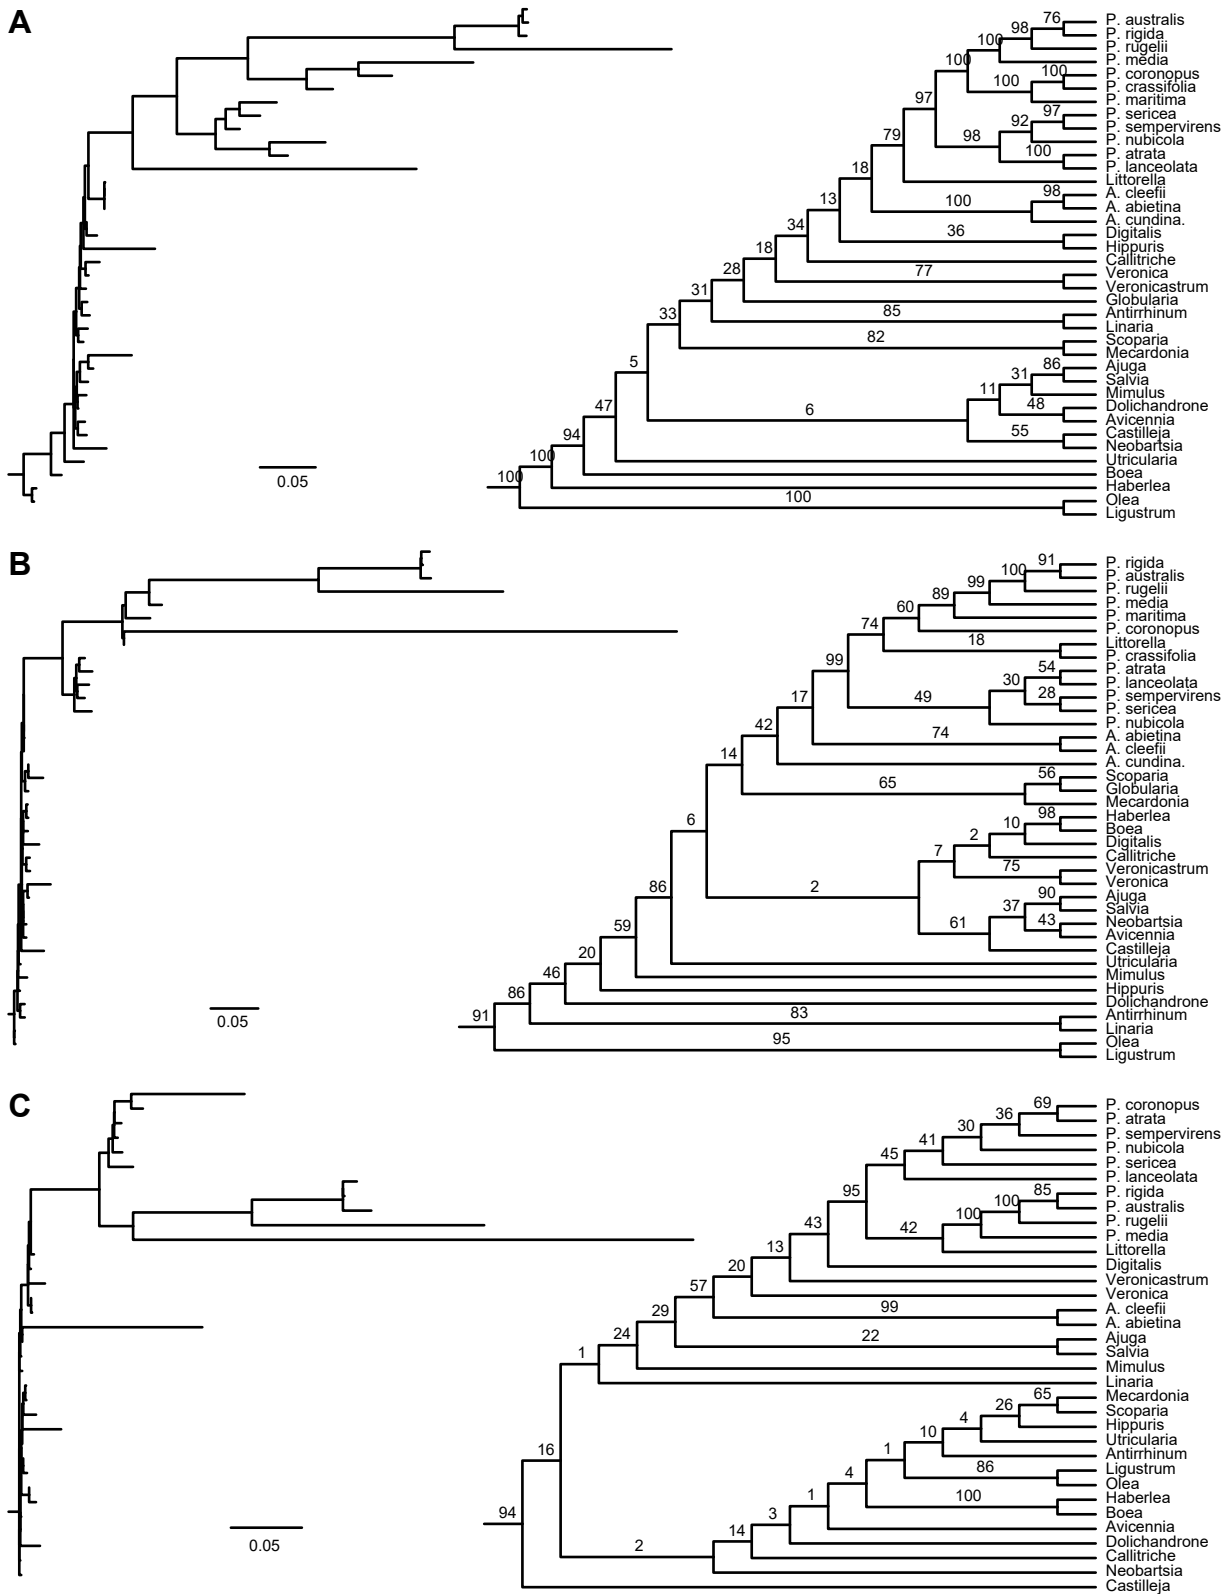

**Figure S1.** Maximum likelihood phylograms (left) and cladograms (right) from individual analysis of mitochondrial A) *atp1*, B) *cox1*, and C) *rrn18*. Asterid outgroups (*Daucus*, *Helianthus*, *Panax*) not shown.

**Table S1.** Source of plant materials and sequencing information

| <b>Species</b>                 | <b>Source</b>                                                                 | <b>Sequence information</b>     |
|--------------------------------|-------------------------------------------------------------------------------|---------------------------------|
| <i>Antirrhinum majus</i>       | read data from NCBI SRA (ERR2124222)                                          | Illumina HiSeq 2x90 (14.5 Gb)   |
| <i>Aragoa abietina</i>         | dried tissue from Colombia [voucher N Pabón-Mora & F González 288 (COL, HUA)] | Illumina HiSeq 2x125 (6.3 Gb)   |
| <i>Aragoa cleefii</i>          | dried tissue from Colombia [voucher F González 4614 (COL, HUA)]               | Illumina HiSeq 2x125 (7.0 Gb)   |
| <i>Aragoa cundinamarcensis</i> | DNA from Kew DNA Bank (ID 11177)                                              | Sanger sequenced PCR amplicons  |
| <i>Callitriche palustris</i>   | read data from NCBI SRA (SRR14844933)                                         | Illumina HiSeq 2x150 (3.5 Gb)   |
| <i>Hippuris vulgaris</i>       | read data from NCBI SRA (SRR12879273)                                         | Illumina BGISEq 2x150 (3.1 Gb)  |
| <i>Linaria vulgaris</i>        | read data from NCBI SRA (SRR2156275)                                          | Ion Torrent avg 268 bp (1.0 Gb) |
| <i>Littorella uniflora</i>     | live plant from Štěpán Husák (Czech Acad. Sciences)                           | Illumina HiSeq 2x100 (9.4 Gb)   |
| <i>Mecardonia procumbens</i>   | read data from NCBI SRA (SRR7121950)                                          | Illumina BGISEq 2x100 (74 Gb)   |
| <i>Plantago afra</i>           | seeds from Dijon Botanical Garden                                             | Illumina HiSeq 2x150 (2.2 Gb)   |
| <i>Plantago nubicola</i>       | dried tissue from Stephan Beck (Herbario Nac. Bolivia) [SG Beck 34557 (LPB)]  | Illumina HiSeq 2x125 (6.4 Gb)   |
| <i>Scoparia dulcis</i>         | read data from NCBI SRA (SRR7121581)                                          | Illumina BGISEq 2x100 (60 Gb)   |
| <i>Veronicastrum axillare</i>  | read data from NCBI SRA (SRR13607868)                                         | Illumina NovaSeq 2x149 (3.5 Gb) |

**Table S2.** Accession numbers for mitochondrial genes

| <b>Species</b>                    | <b><i>atp1</i></b> | <b><i>cox1</i></b> | <b><i>rrn18</i></b> |
|-----------------------------------|--------------------|--------------------|---------------------|
| <b>Plantaginaceae</b>             |                    |                    |                     |
| <i>Antirrhinum majus</i>          | <b>OK523427</b>    | <b>OK559378</b>    | <b>OK559387</b>     |
| <i>Aragoa abietina</i>            | <b>OK514181</b>    | <b>OK514181</b>    | <b>OK514181</b>     |
| <i>Aragoa cleefii</i>             | <b>OK514182</b>    | <b>OK514182</b>    | <b>OK514182</b>     |
| <i>Aragoa cundinamarcensis</i>    | <b>OK523428</b>    | EU069509           | –                   |
| <i>Callitriche palustris</i>      | <b>OK523429</b>    | <b>OK559379</b>    | <b>OK559388</b>     |
| <i>Digitalis purpurea</i>         | AY741841           | AJ223415           | AF193999            |
| <i>Globularia punctata</i>        | AY741842           | EU156494           | –                   |
| <i>Hippuris vulgaris</i>          | <b>OK523430</b>    | <b>OK559380</b>    | <b>OK559389</b>     |
| <i>Linaria vulgaris</i>           | <b>OK523431</b>    | <b>OK559381</b>    | <b>OK559390</b>     |
| <i>Littorella uniflora</i>        | <b>OK523432</b>    | <b>OK559382</b>    | <b>OK559391</b>     |
| <i>Mecardonia procumbens</i>      | <b>OK523433</b>    | <b>OK559383</b>    | <b>OK559392</b>     |
| <i>Plantago afra</i>              | <b>OK959863</b>    | <b>OK959864</b>    | <b>OK959865</b>     |
| <i>Plantago atrata</i>            | AY818936           | EU069536           | AJ389618            |
| <i>Plantago australis</i>         | AY741847           | AJ389608           | AY818949            |
| <i>Plantago coronopus</i>         | AY741843           | AJ389609           | AJ389617            |
| <i>Plantago crassifolia</i>       | AY741844           | EU069516           | <b>OK959866</b>     |
| <i>Plantago lanceolata</i>        | AY818937           | AJ389611           | AJ389619            |
| <i>Plantago maritima</i>          | HQ593805           | EU069522           | <b>OK959867</b>     |
| <i>Plantago media</i>             | AY818938           | AJ389605           | AJ389614            |
| <i>Plantago nubicola</i>          | <b>OK523434</b>    | <b>OK559384</b>    | <b>OK559393</b>     |
| <i>Plantago rigida</i>            | AY741848           | AJ389607           | AJ389616            |
| <i>Plantago rugelii</i>           | AY818939           | AJ389606           | AJ389615            |
| <i>Plantago sempervirens</i>      | AY818940           | AJ389612           | AJ389620            |
| <i>Plantago sericea</i>           | AY818941           | AJ389613           | AJ389621            |
| <i>Scoparia dulcis</i>            | <b>OK523435</b>    | <b>OK559385</b>    | <b>OK559394</b>     |
| <i>Veronica</i> spp.              | AY818943           | AJ223427           | AY818950            |
| <i>Veronicastrum axillare</i>     | <b>OK523436</b>    | <b>OK559386</b>    | <b>OK559395</b>     |
| <b>Other Lamiales</b>             |                    |                    |                     |
| <i>Ajuga reptans</i>              | KF709392           | KF709392           | KF709392            |
| <i>Avicennia marina</i>           | CM032784           | CM032784           | CM032784            |
| <i>Boea hygrometrica</i>          | JN107812           | JN107812           | JN107812            |
| <i>Castilleja paramensis</i>      | KT959112           | KT959112           | KT959112            |
| <i>Dolichandrone cauda-felina</i> | MW432178           | MW432178           | MW432178            |
| <i>Haberlea rhodopensis</i>       | MH757117           | MH757117           | MH757117            |
| <i>Ligustrum quihoui</i>          | MN723864           | MN723864           | MN723864            |
| <i>Mimulus guttatus</i>           | JN098455           | JN098455           | JN098455            |
| <i>Neobartsia pedicularioides</i> | KP940487           | KP940490           | KP940492            |
| <i>Olea europaea</i>              | MG372117           | MG372117           | MG372117            |
| <i>Salvia miltiorrhiza</i>        | KF177345           | KF177345           | KF177345            |
| <i>Utricularia reniformis</i>     | KY774314           | KY774314           | KY774314            |

Sequences newly generated for this study are shown in bold

**Table S3.** Accession numbers for the nuclear rRNA gene cluster

| <b>Species</b>                  | <b>Accession</b>  |
|---------------------------------|-------------------|
| <b>Plantaginaceae</b>           |                   |
| <i>Antirrhinum majus</i>        | <b>OK523398</b>   |
| <i>Aragoa abietina</i>          | <b>OK523399</b>   |
| <i>Aragoa cleefii</i>           | <b>OK523400</b>   |
| <i>Callitriche palustris</i>    | <b>OK523401</b>   |
| <i>Digitalis purpurea</i>       | AF193940+KM887394 |
| <i>Hippuris vulgaris</i>        | <b>OK523402</b>   |
| <i>Linaria vulgaris</i>         | <b>OK523403</b>   |
| <i>Littorella uniflora</i>      | <b>OK523404</b>   |
| <i>Littorella uniflora</i>      | MT796524          |
| <i>Mecardonia procumbens</i>    | <b>OK523405</b>   |
| <i>Plantago afra</i>            | <b>OK523406</b>   |
| <i>Plantago alpina</i>          | <b>OK523407</b>   |
| <i>Plantago arenaria</i>        | <b>OK523408</b>   |
| <i>Plantago atrata</i>          | <b>OK523409</b>   |
| <i>Plantago australis</i>       | <b>OK523410</b>   |
| <i>Plantago brasiliensis</i>    | <b>OK523411</b>   |
| <i>Plantago coronopus</i>       | <b>OK523412</b>   |
| <i>Plantago crassifolia</i>     | <b>OK523413</b>   |
| <i>Plantago depressa</i>        | <b>OK523414</b>   |
| <i>Plantago lagopus</i>         | <b>OK523415</b>   |
| <i>Plantago major</i>           | MT937126          |
| <i>Plantago maritima</i>        | <b>OK523416</b>   |
| <i>Plantago media</i>           | <b>OK523417</b>   |
| <i>Plantago nubicola</i>        | <b>OK523418</b>   |
| <i>Plantago ovata</i>           | <b>OK523419</b>   |
| <i>Plantago rigida</i>          | <b>OK523420</b>   |
| <i>Plantago rugelii</i>         | <b>OK523421</b>   |
| <i>Plantago sericea</i>         | <b>OK523422</b>   |
| <i>Plantago tenuiflora</i>      | <b>OK523423</b>   |
| <i>Scoparia dulcis</i>          | <b>OK523424</b>   |
| <i>Veronica chamaedrys</i>      | MT796584          |
| <i>Veronica undulata</i>        | <b>OK523425</b>   |
| <i>Veronicastrum axillare</i>   | <b>OK523426</b>   |
| <b>Other Lamiales</b>           |                   |
| <i>Dolichandra cynanchoides</i> | MK678751          |
| <i>Eremophila glabra</i>        | MN411332          |
| <i>Fraxinus excelsior</i>       | MT796551          |
| <i>Melampyrum pratense</i>      | MT937124          |
| <i>Myoporum parvifolium</i>     | MN411417          |
| <i>Olea europaea</i>            | MW646765          |
| <i>Paulownia tomentosa</i>      | KP718625          |
| <i>Pogostemon yatabeanus</i>    | KP718619          |
| <i>Salvia carduacea</i>         | MK257800          |
| <i>Schropularia buergeriana</i> | KP718627          |
| <i>Utricularia minor</i>        | MT796583          |
| <i>Verbena stricta</i>          | MT610971          |

Sequences newly generated for this study are shown in bold
